# Supplementary material for: Influence of Mulching on Replantation Disease in Sour Cherry Orchard
Source: MDPI journal article supplement (doi:10.3390/agriculture13081587), 2023-08-09
Supplement: s1 [file s1]

**Table S1.** The influence of the position and composting after mushroom cultivation on fruit firmness in 2008-2016.

| Year | OR1      |          | OR2      |         | Mean    |         | Mean           |         |
|------|----------|----------|----------|---------|---------|---------|----------------|---------|
|      | C        | M        | C        | M       | OR1     | OR2     | C              | M       |
| 2008 | 200.3 a  | 201.5 a  | 200.0 a  | 189.3 a | 200.9 A | 194.6 A | 200.1 A        | 195.4 A |
| 2009 | 205.8 a  | 220.3 a  | 193.5 a  | 217.5 a | 213.0 A | 205.5 A | 199.6 A        | 218.9 A |
| 2010 | 209.4 b  | 199.1 ab | 188.3 a  | 200.1ab | 204.3 A | 194.2 A | 198.8 A        | 200.0 A |
| 2011 | 201.1 b  | 183.9 a  | 204.3 b  | 200.9 b | 192.5 A | 202.7 B | 202.7 <b>B</b> | 192.5 A |
| 2012 | 188.4 ab | 184.6 a  | 194.1 ab | 199.2 b | 186.5 A | 196.7 B | 191.3 A        | 191.9 A |
| 2013 | 190.9 a  | 191.1 a  | 210.2 b  | 205.3 b | 191.0 A | 207.8 B | 200.6 A        | 198.2 A |
| 2014 | 214.6 a  | 217.5 a  | 220.4 a  | 228.4   | 216.1 A | 224.4 A | 217.5 A        | 222.9 A |
| 2015 | 231.9 a  | 206.3 a  | 221.5 a  | 208.6 a | 219.1 A | 215.1 A | 226.7 A        | 207.4 A |
| 2016 | 184.4 a  | 182.6 a  | 187.5 a  | 197.0 a | 183.5 A | 192.3 A | 185.9 A        | 189.8 A |
|      | 203.0 a  | 198.5 a  | 202.2 a  | 205.2 a | 200.8 A | 203.7 A | 202.6 A        | 201.8 A |

Two-factor analysis. Means in rows marked with the same letters do not differ significantly for the significance level of  $p=0.05$ .

<sup>1</sup> lowercase letters in the lines indicate significant differences between planting area × mulching,

<sup>2</sup> upper case letters in the lines indicate significant differences between planting area,

<sup>3</sup> bold upper-case letters in the lines indicate significant differences between mulching, (at  $p \leq 0.05$ , according to the Duncan test).

OR1- orchard after replantation, OR2- orchard on virgin soil, C- control without mulching, M- mulching.

**Table S2.** Firmness of the Łutówka cultivar in 2006-2013.

| Treatment | Firmness      |         |       |          |
|-----------|---------------|---------|-------|----------|
|           | Planting area |         |       |          |
|           | OR1           | OR2     | Mean  |          |
| C         | 203.0 a       | 202.2 a | 202.6 | <b>A</b> |
| M         | 198.5 a       | 205.2 a | 201.8 | <b>A</b> |
| Mean      | 200.8 A       | 203.7 A |       |          |

<sup>1</sup> orchard × treatment; the same letters are not significantly different at  $\alpha = 0.05$  (Duncan's test).

<sup>2</sup> means that the same capital letters in the row are not significantly different at  $\alpha = 0.05$  (Duncan's test).

<sup>3</sup> means that the same capital bold letters in the column are not significantly different at  $\alpha = 0.05$  (Duncan's test).

OR1- orchard after replantation, OR2- orchard on virgin soil, C- control without mulching, M- mulching.

**Table S3.** The influence of the site and mulching on the hydrolytic acidity of fruit in 2008-2016.

| Treatment | Acidity       |         |      |          |
|-----------|---------------|---------|------|----------|
|           | Planting area |         |      |          |
|           | OR1           | OR2     | Mean |          |
| C         | 1.73 ab       | 1.76 b  | 1.75 | <b>A</b> |
| M         | 1.70 a        | 1.72 ab | 1.71 | <b>A</b> |
| Mean      | 1.72 A        | 1.75 A  |      |          |

<sup>1</sup> see table S2.

**Table S4.** The influence of the site and mulching on titratable acidity of fruit in 2008-2016.

| Year | OR1   |        | OR2    |        | Mean   |       | Mean  |       |
|------|-------|--------|--------|--------|--------|-------|-------|-------|
|      | C     | M      | C      | M      | OR1    | OR2   | C     | M     |
| 2008 | 2.3 c | 2.2 bc | 2.1 b  | 1.9 a  | 2.2 B  | 2.0 A | 2.2 A | 2.1 B |
| 2009 | 2.0 b | 1.3 a  | 1.7 b  | 1.8 b  | 1.6 A  | 1.7 A | 1.8 B | 1.6 A |
| 2010 | 2.0 b | 1.6 a  | 1.8 ab | 1.9 ab | 18.8 A | 1.9 A | 2.0 A | 1.8 A |
| 2011 | 1.9 a | 1.9 a  | 2.0 ab | 2.1 b  | 1.9 A  | 2.0 B | 2.0 A | 2.0 A |
| 2012 | 1.3 a | 1.6 c  | 1.8 d  | 1.4 b  | 1.4 A  | 1.6 B | 1.5 A | 1.5 A |
| 2013 | 1.8 a | 1.8 a  | 1.6 a  | 1.6 a  | 1.8 B  | 1.6 A | 1.7 A | 1.7 A |
| 2014 | 1.5 a | 1.6 a  | 1.6 a  | 1.6 a  | 1.6 A  | 1.6 A | 1.6 A | 1.6 A |
| 2015 | 1.6 a | 1.6 a  | 1.6 a  | 1.6 a  | 1.6 A  | 1.6 A | 1.6 A | 1.6 A |
| 2016 | 1.7 b | 1.5 a  | 1.7 b  | 1.6 ab | 1.6 A  | 1.7 A | 1.7 B | 1.6 A |

<sup>1</sup> see table S1.
